# Supplementary material for: Efficient freeze-drying of foamed strawberry puree: a study on drying kinetics and physicochemical properties
Source: Royal Society of Chemistry journal article supplement (doi:10.1039/d4fb00227j), 2024-11-06
Supplement: d4fb00227j1.pdf [file d4fb00227j1.pdf]

Table 1S *UPLC-MS/MS* acquisition parameters (dynamic-MRM mode) used for the analysis of anthocyanins in positive ionization modes.

| No. | Compounds                            | Parent (m/z) | Daughter 1* (m/z) | Daughter 2 (m/z) | Cone (V) | Collision (V) | Polarity | Retention time (Rt, min) |
|-----|--------------------------------------|--------------|-------------------|------------------|----------|---------------|----------|--------------------------|
| 1   | Delphinidin-3,5-diglucoside chloride | 627.21       | 303.06            | 465.09           | 46       | 34            | Positive | 1.82                     |
| 2   | Pelargonidin-3-rutinoside chloride   | 579.21       | 271.06            |                  | 44       | 46            | Positive | 1.89                     |
| 3   | Delphinidin-3-galactoside chloride   | 465.20       | 302.99            |                  | 38       | 32            | Positive | 1.82                     |
| 4   | Cyanidin-3-glucoside                 | 449.13       | 287.02            | 136.93           | 36       | 22            | Positive | 1.87                     |
| 5   | Pelargonidin-3-glucoside             | 433.18       | 271.01            |                  | 18       | 24            | Positive | 1.92                     |

The product ion, daughter 1 was used for quantification.
